# Supplementary material for: FiberGrowth Pipeline: A Framework Toward Predicting Fiber-Specific Growth From Human Gut Bacteroidetes Genomes
Source: Frontiers journal article supplement (doi:10.3389/fmicb.2021.632567), 2021-10-06
Supplement: Data_Sheet_1.zip [file Data_Sheet_1.zip]

# Gene family

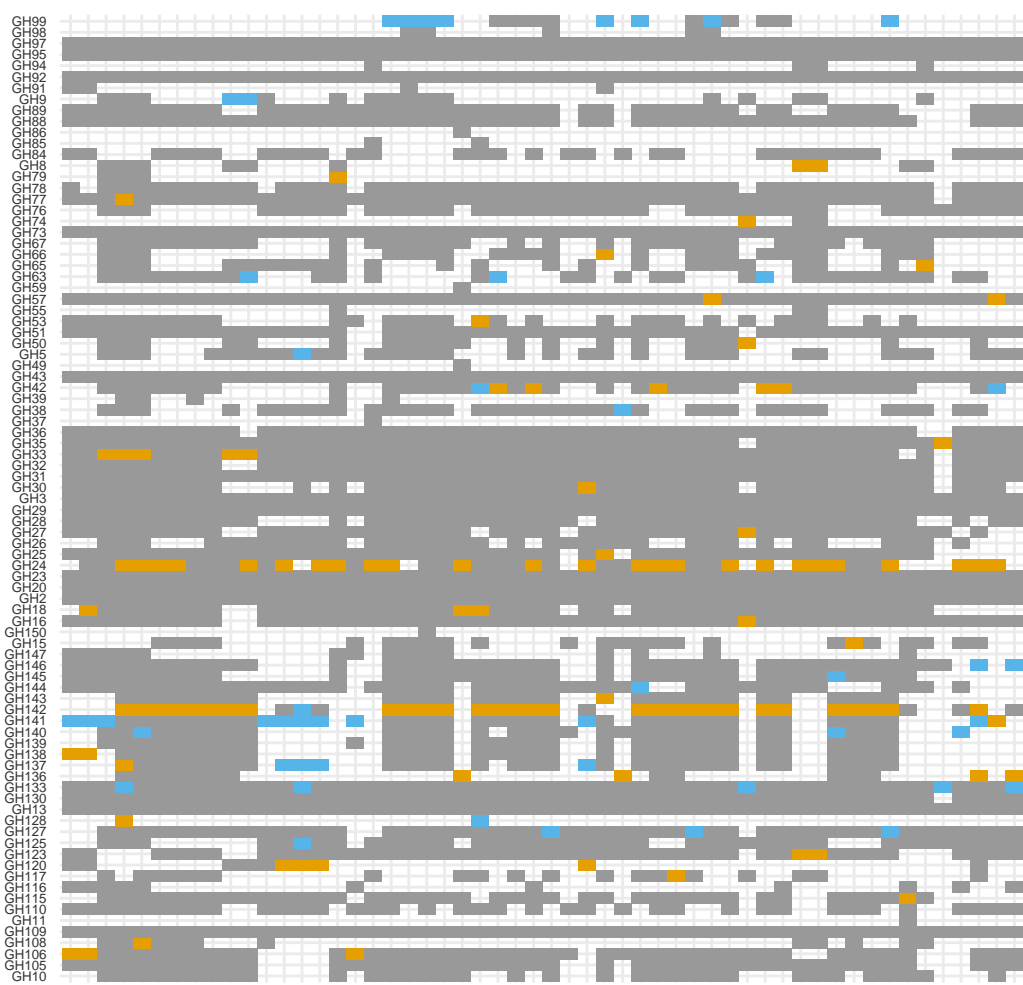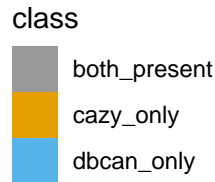

Bacteroides\_caccae\_ATCC\_43185  
 Bacteroides\_caccae\_CL03T12C61  
 Bacteroides\_cellulosilyticus\_CL02T12C19  
 Bacteroides\_cellulosilyticus\_DSM\_14838  
 Bacteroides\_cellulosilyticus\_WH2  
 Bacteroides\_dorei\_CL02T00C15  
 Bacteroides\_dorei\_CL02T12C06  
 Bacteroides\_dorei\_CL03T12C01  
 Bacteroides\_dorei\_DSM\_17855  
 Bacteroides\_eggerthii\_1\_2\_48FAA  
 Bacteroides\_eggerthii\_DSM\_20697  
 Bacteroides\_fragilis\_3\_1\_12  
 Bacteroides\_fragilis\_CL03T00C08  
 Bacteroides\_fragilis\_NCTC\_9343  
 Bacteroides\_fragilis\_YCH46  
 Bacteroides\_intestinalis\_DSM\_17393  
 Bacteroides\_massiliensis\_DSM\_17679  
 Bacteroides\_nordii\_CL02T12C05  
 Bacteroides\_ovatus\_3\_8\_47FAA  
 Bacteroides\_ovatus\_ATCC\_8483  
 Bacteroides\_ovatus\_CL02T12C04  
 Bacteroides\_ovatus\_CL03T12C18  
 Bacteroides\_plebeius\_DSM\_17135  
 Bacteroides\_salysiae\_CL02T12C01  
 Bacteroides\_sp.\_1\_1\_14  
 Bacteroides\_sp.\_1\_1\_30  
 Bacteroides\_sp.\_1\_1\_6  
 Bacteroides\_sp.\_2\_1\_22  
 Bacteroides\_sp.\_2\_1\_33B  
 Bacteroides\_sp.\_2\_1\_56FAA  
 Bacteroides\_sp.\_2\_2\_4  
 Bacteroides\_sp.\_3\_1\_19  
 Bacteroides\_sp.\_3\_1\_23  
 Bacteroides\_sp.\_3\_1\_40A  
 Bacteroides\_sp.\_4\_3\_47FAA  
 Bacteroides\_sp.\_D1  
 Bacteroides\_sp.\_D2  
 Bacteroides\_sp.\_D22  
 Bacteroides\_steroris\_ATCC\_43183  
 Bacteroides\_thetaiotaomicron\_7330  
 Bacteroides\_thetaiotaomicron\_VPI\_5482  
 Bacteroides\_uniformis\_CL03T00C23  
 Bacteroides\_uniformis\_CL03T12C37  
 Bacteroides\_vulgatus\_ATCC\_8482  
 Bacteroides\_vulgatus\_CL09T03C04  
 Bacteroides\_vulgatus\_PC510  
 Bacteroides\_xylanisolvens\_CL03T12C04  
 Dysgonomonas\_gadei\_ATCC\_BAA-286  
 Dysgonomonas\_mosii\_DSM\_22836  
 Odoribacter\_splanchincus\_DSM\_20712  
 Parabacteroides\_distasonis\_ATCC\_8503  
 Parabacteroides\_gordonii\_DSM\_23371  
 Parabacteroides\_johnsonii\_DSM\_18315  
 Parabacteroides\_merdae\_ATCC\_43184
