# Supplementary material for: FiberGrowth Pipeline: A Framework Toward Predicting Fiber-Specific Growth From Human Gut Bacteroidetes Genomes
Source: Frontiers journal article supplement (doi:10.3389/fmicb.2021.632567), 2021-10-06
Supplement: Data_Sheet_2.ZIP [file Data_Sheet_2.ZIP]

## Sheet: Sheet1
ARABINOXYLAN					HEPARIN
HmmID	Position	RefStrand	GeneName		HmmID	Position	RefStrand	GeneName
Glyco_hydro_67N	1	-	GH67		Hepar_II_III	1	+	PL15
Glyco_hydro_43	2	-	GH43_1		MFS_1	2	+	galactose_transporter
Glyco_hydro_10	3	-	GH10		ROK	3	+	repressor
MFS_2	4	-	sugar_trasnport_protein		Sulfatase	4	+	sulfatase
SASA	5	-	carbohydrate_esterase		Glyco_hydro_88	5	+	GH88
Glyco_hydro_2_N	6	-	sugar_binding_domain		SusD_RagB	6	+	SusD_RagB
SusD-like_3	7	-	SusDlike3		Plug	7	+	TonB_plug
SusD_RagB	8	-	SusD_RagB		TonB_dep_Rec	8	+	TonB
Plug	9	-	TonB_plug		Response_reg	9	+	HTCS
TonB_dep_Rec	10	-	TonB		Polysacc_lyase	10	-	PL13
Reg_prop	11	+	Cell_signaling
HisKA	12	+	Cell_signaling
Response_ref	13	+	Gene_expression_regulator
INULIN					LEVAN
HmmID	Position	RefStrand	GeneName		HmmID	Position	RefStrand	GeneName
custom_GH32	1	+	GH32_Btheta_like		HATPase_c	1	+	HTCS
custom_TonB	2	+	TonB_Bcaccae_like		PfkB	2	+	fructokinase
SusD_RagB	3	+	SusD_RagB		MFS_1	3	+	glucose_transporter
SusD-like	4	+	SusDlike		Glyco_hydro_32N	4	+	GH32
SusD-like_3	5	+	SusDlike3		custom_GH32	5	+	GH32Btheta_like
Glyco_hydro_32C	6	+	GH32_Pfam		PCMD	6	+	carbohydrate_binding_domain
PfkB	7	+	fructokinase		SusD-like3	7	+	SusD
MFS_1	8	+	transporter		Plug	8	+	TonB_plug
SusR	9	+	SusR		levanase_homemade	9	+	levanase
Laminarin					MUCIN
HmmID	Position	RefStrand	GeneName		HmmID	Position	RefStrand	GeneName
AraC_binding	1	-	AraC		Sigma70_r2	1	+	ECF-sigma
Y.Y.Y	2	-	ligand_binding		FecR	2	+	anti-sigma
CarbopepD_reg_2	3	-	susD_like		CarbopepD_reg_2	3	+	SusC
Plug	4	-	TonB_plug		TonB_dep_Rec	4	+	TonB
GDPD	5	-	GH16_part		SusD-like	5	+	SusDlike
Glyco_hydro_16	6	-	GH16		DUF4849	6	+	GH18
Glyco_hydro_3	7	-	GH3		Glyco_hydro_16	7	+	GH16
Glyco_hydro_3_C	8	-	GH3		Glyco_hydro_18	8	+	GH18_chitinase
Fn3-like	9	-	GH3_part		Glyco_hydro_92	9	+	GH92
					Laminin_G_3	10	+	glucanase
STARCH					HisKA	11	-	HTCS
HmmID	Position	RefStrand	GeneName
SusF_SusE	1	-	SusF_SusE
SusD_RagB	2	-	SusD_RagB
TonB_dep_Rec	3	-	TonB
Glyco_hydro_97	4	-	GH97
Alpha-amylase	6	-	GH13
SusR	7	+	SusR
bold: essential gene; growth is predicted based on presence of these genes

## Sheet: inverted_PULs
ARABINOXYLAN					HEPARIN
HmmID	Position	RefStrand	GeneName		HmmID	Position	RefStrand	GeneName
Response_ref	1	-	Gene expression regulator		Hepar_II_III	1	+	PL15
HisKA	2	-	Cell signaling		MFS_1	2	+	galactose transporter
Reg_prop	3	-	Cell signaling		ROK	3	+	repressor
TonB_dep_Rec	4	+	TonB		Sulfatase	4	+	sulfatase
Plug	5	+	TonB plug		Glyco_hydro_88	5	+	GH88
SusD_RagB	6	+	SusD RagB		SusD_RagB	6	+	SusD RagB
SusD-like_3	7	+	SusDlike3		Plug	7	+	TonB plug
Glyco_hydro_2_N	8	+	sugar binding domain		TonB_dep_Rec	8	+	TonB
SASA	9	+	carbohydrate esterase		Response_reg	9	+	HTCS
MFS_2	10	+	sugar trasnport protein		Polysacc_lyase	10	-	PL13
Glyco_hydro_10	11	+	GH10
Glyco_hydro_43	12	+	GH43 1
Glyco_hydro_67N	13	+	GH67
INULIN					LEVAN
HmmID	Position	RefStrand	GeneName		HmmID	Position	RefStrand	GeneName
custom_GH32	1	+	GH32 Btheta like		HATPase_c	1	+	HTCS
custom_TonB	2	+	TonB Bcaccae like		PfkB	2	+	fructokinase
SusD_RagB	3	+	SusD RagB		MFS_1	3	+	glucose transporter
SusD-like	4	+	SusDlike		Glyco_hydro_32N	4	+	GH32
SusD-like_3	5	+	SusDlike3		custom_GH32	5	+	GH32Btheta like
Glyco_hydro_32C	6	+	GH32 Pfam		PCMD	6	+	carbohydrate binding domain
PfkB	7	+	fructokinase		SusD-like3	7	+	SusD
MFS_1	8	+	transporter		Plug	8	+	TonB plug
SusR	9	+	SusR		levanase_homemade	9	+	levanase
Laminarin					MUCIN
HmmID	Position	RefStrand	GeneName		HmmID	Position	RefStrand	GeneName
Fn3-like	1	+	GH3 part		Sigma70_r2	1	+	ECF-sigma
Glyco_hydro_3_C	2	+	GH3		FecR	2	+	anti-sigma
Glyco_hydro_3	3	+	GH3		CarbopepD_reg_2	3	+	SusC
Glyco_hydro_16	4	+	GH16		TonB_dep_Rec	4	+	TonB
GDPD	5	+	GH16 part		SusD-like	5	+	SusDlike
Plug	6	+	TonB plug		DUF4849	6	+	GH18
CarbopepD_reg_2	7	+	susD like		Glyco_hydro_16	7	+	GH16
Y.Y.Y	8	+	ligand binding		Glyco_hydro_18	8	+	GH18 chitinase
AraC_binding	9	+	AraC		Glyco_hydro_92	9	+	GH92
					Laminin_G_3	10	+	glucanase
STARCH					HisKA	11	-	HTCS
HmmID	Position	RefStrand	GeneName
SusR	1	-	SusR
Alpha-amylase	2	+	GH13
Glyco_hydro_97	3	+	GH97
TonB_dep_Rec	4	+	TonB
SusD_RagB	5	+	SusD RagB
SusF_SusE	6	+	SusF SusE
bold: essential gene; growth is predicted based on presence of these genes

## Sheet: concat inverted_PULs
HmmID	Position	RefStrand	GeneName	Fiber
Response_ref	1	-	Gene_expression_regulator	arabinoxylan
HisKA	2	-	Cell_signaling	arabinoxylan
Reg_prop	3	-	Cell_signaling	arabinoxylan
TonB_dep_Rec	4	+	TonB	arabinoxylan
Plug	5	+	TonB_plug	arabinoxylan
SusD_RagB	6	+	SusD_RagB	arabinoxylan
SusD-like_3	7	+	SusDlike3	arabinoxylan
Glyco_hydro_2_N	8	+	sugar_binding_domain	arabinoxylan
SASA	9	+	carbohydrate_esterase	arabinoxylan
MFS_2	10	+	sugar_trasnport_protein	arabinoxylan
Glyco_hydro_10	11	+	GH10	arabinoxylan
Glyco_hydro_43	12	+	GH43_1	arabinoxylan
Glyco_hydro_67N	13	+	GH67	arabinoxylan
custom_GH32	1	+	GH32_Btheta_like	inulin
custom_TonB	2	+	TonB_Bcaccae_like	inulin
SusD_RagB	3	+	SusD_RagB	inulin
SusD-like	4	+	SusDlike	inulin
SusD-like_3	5	+	SusDlike3	inulin
Glyco_hydro_32C	6	+	GH32_Pfam	inulin
PfkB	7	+	fructokinase	inulin
MFS_1	8	+	transporter	inulin
SusR	9	+	SusR	inulin
Fn3-like	1	+	GH3_part	laminarin
Glyco_hydro_3_C	2	+	GH3	laminarin
Glyco_hydro_3	3	+	GH3	laminarin
Glyco_hydro_16	4	+	GH16	laminarin
GDPD	5	+	GH16_part	laminarin
Plug	6	+	TonB_plug	laminarin
CarbopepD_reg_2	7	+	susD_like	laminarin
Y.Y.Y	8	+	ligand_binding	laminarin
AraC_binding	9	+	AraC	laminarin
SusR	1	-	SusR	starch
Alpha-amylase	2	+	GH13	starch
Glyco_hydro_97	3	+	GH97	starch
TonB_dep_Rec	4	+	TonB	starch
SusD_RagB	5	+	SusD_RagB	starch
SusF_SusE	6	+	SusF_SusE	starch
Hepar_II_III	1	+	PL15	heparin
MFS_1	2	+	galactose_transporter	heparin
ROK	3	+	repressor	heparin
Sulfatase	4	+	sulfatase	heparin
Glyco_hydro_88	5	+	GH88	heparin
SusD_RagB	6	+	SusD_RagB	heparin
Plug	7	+	TonB_plug	heparin
TonB_dep_Rec	8	+	TonB	heparin
Response_reg	9	+	HTCS	heparin
Polysacc_lyase	10	-	PL13	heparin
HATPase_c	1	+	HTCS	levan
PfkB	2	+	fructokinase	levan
MFS_1	3	+	glucose_transporter	levan
Glyco_hydro_32N	4	+	GH32	levan
custom_GH32	5	+	GH32Btheta_like	levan
PCMD	6	+	carbohydrate_binding_domain	levan
SusD-like3	7	+	SusD	levan
Plug	8	+	TonB_plug	levan
levanase_homemade	9	+	levanase	levan
Sigma70_r2	1	+	ECF-sigma	mucin
FecR	2	+	anti-sigma	mucin
CarbopepD_reg_2	3	+	SusC	mucin
TonB_dep_Rec	4	+	TonB	mucin
SusD-like	5	+	SusDlike	mucin
DUF4849	6	+	GH18	mucin
Glyco_hydro_16	7	+	GH16	mucin
Glyco_hydro_18	8	+	GH18_chitinase	mucin
Glyco_hydro_92	9	+	GH92	mucin
Laminin_G_3	10	+	glucanase	mucin
HisKA	11	-	HTCS	mucin
