# Supplementary figures and images for: FiberGrowth Pipeline: A Framework Toward Predicting Fiber-Specific Growth From Human Gut Bacteroidetes Genomes
Source: Frontiers journal article supplement (doi:10.3389/fmicb.2021.632567), 2021-10-06

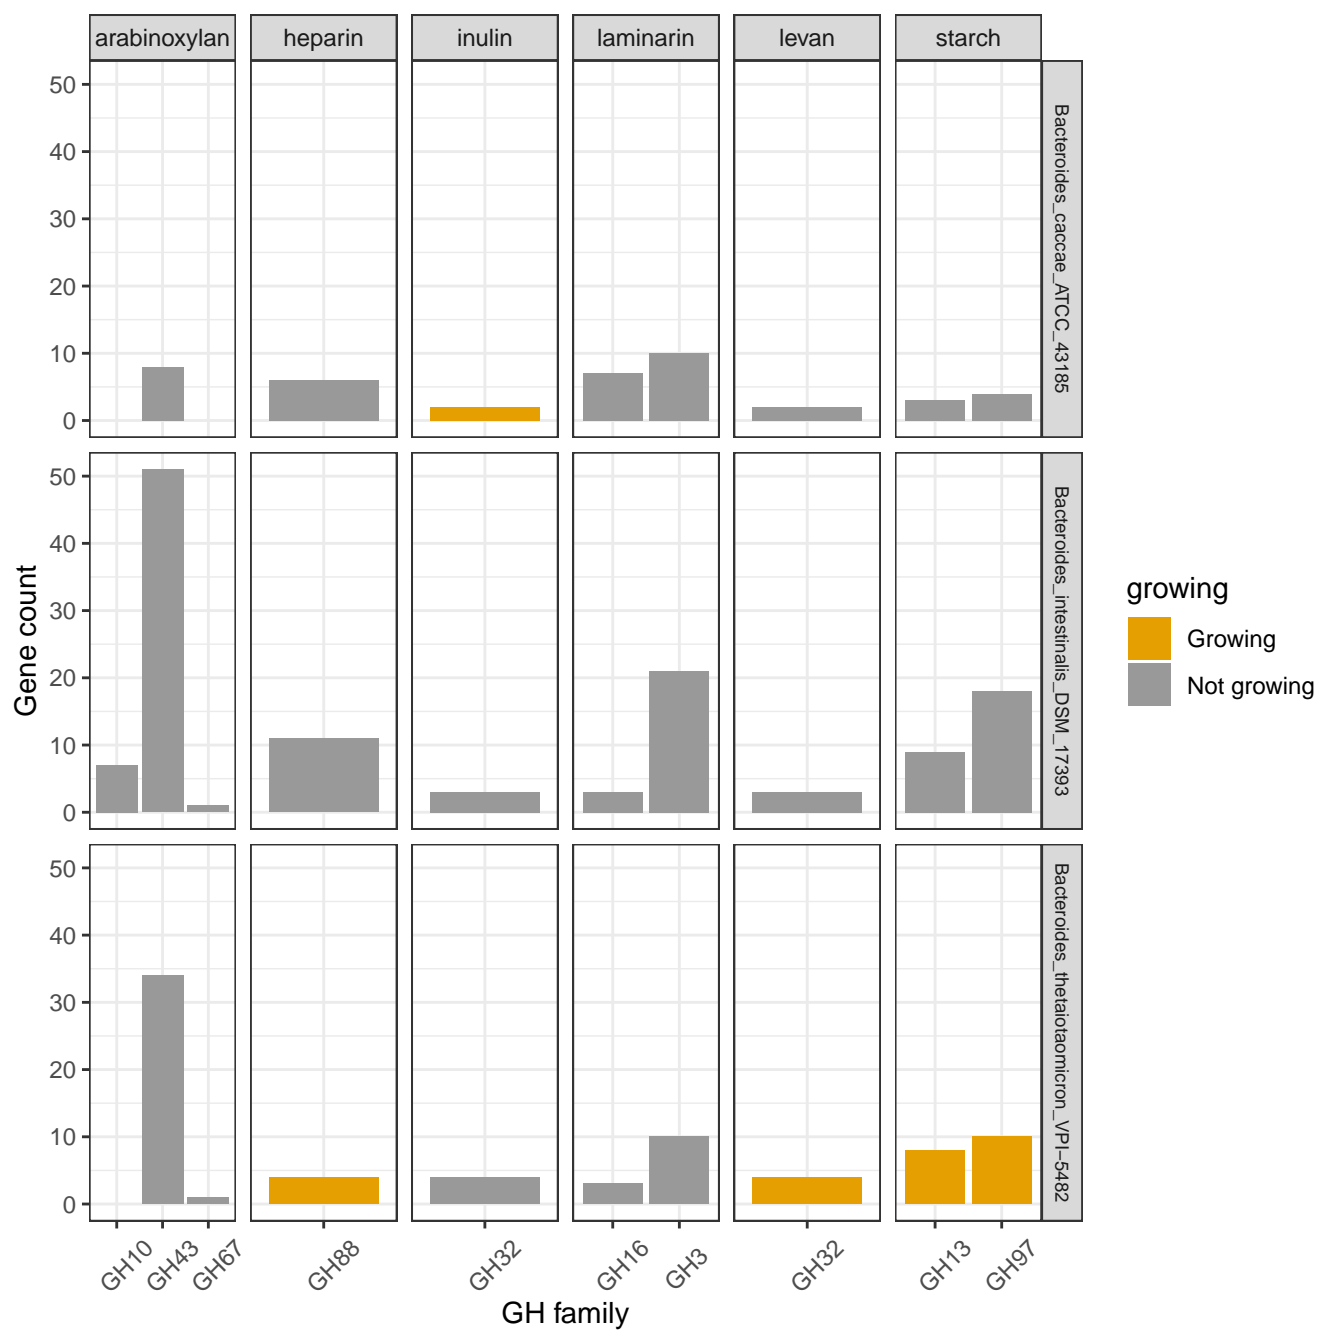

Supplement: Data_Sheet_1.zip [file Data_Sheet_1.zip]

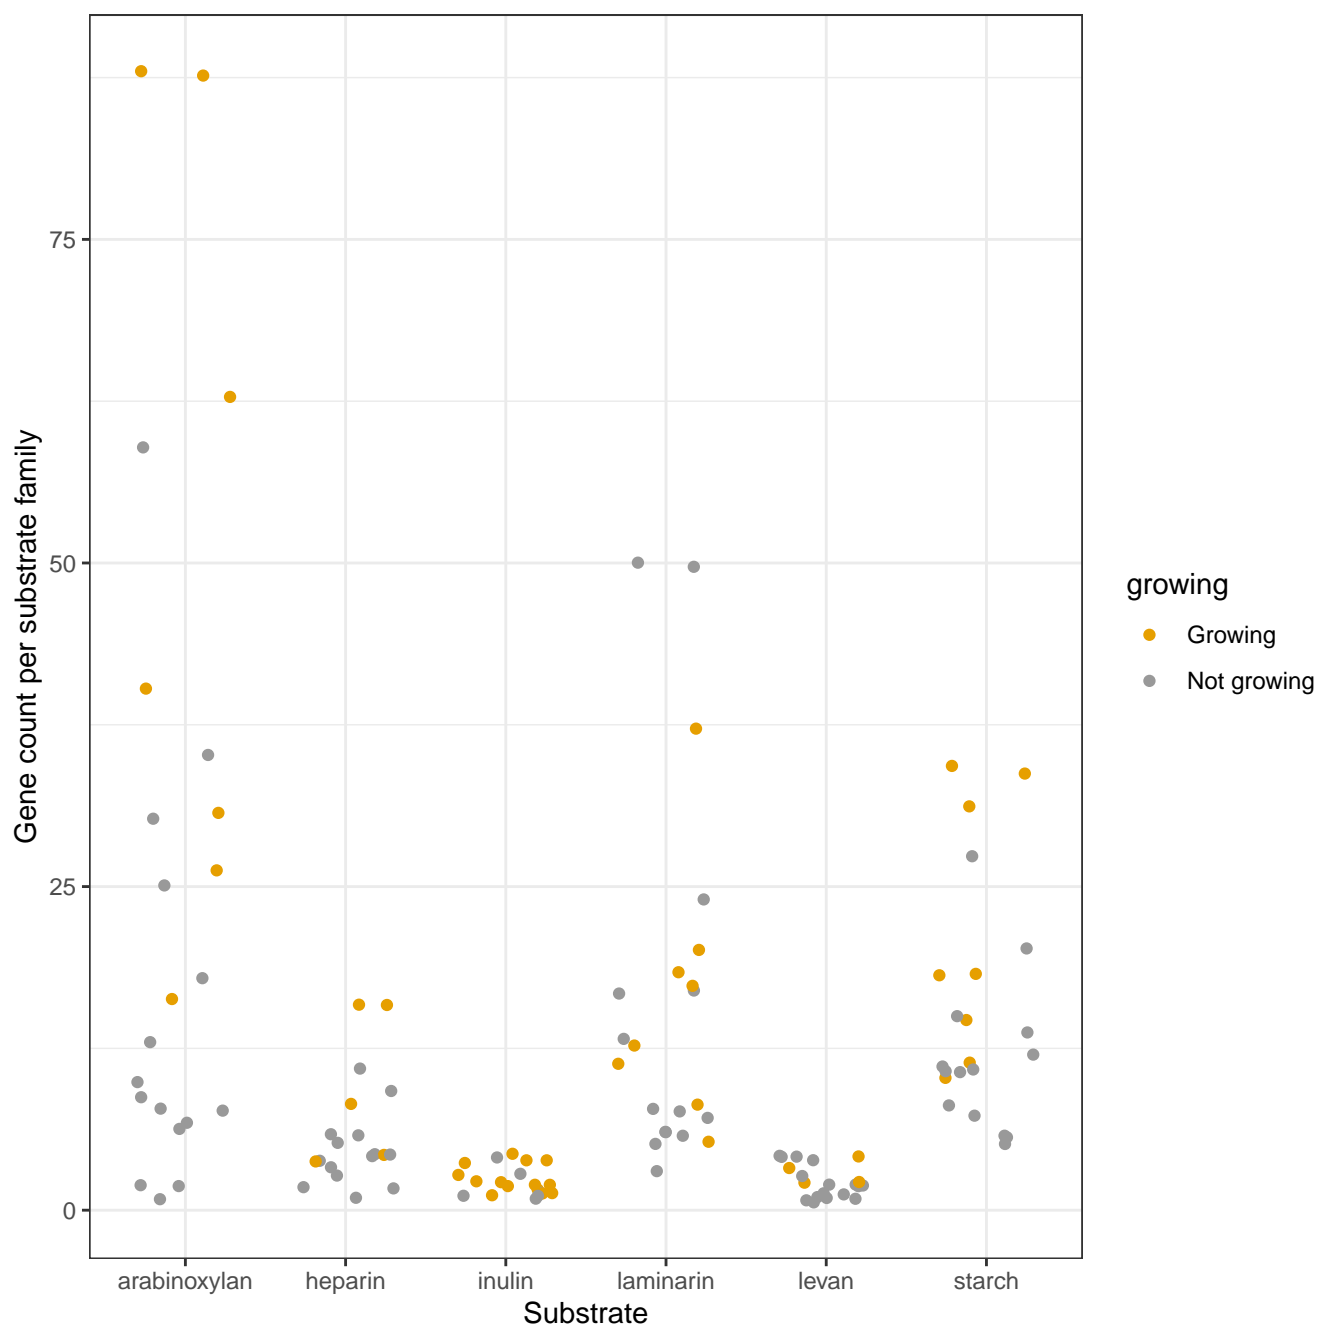

Supplement: Data_Sheet_1.zip [file Data_Sheet_1.zip]
